# Supplementary material for: Highly fluorescent supramolecular gels with chirality transcription through hydrogen bonding
Source: Royal Society of Chemistry journal article supplement (doi:10.1039/b802096e), 2008-01-01
Supplement: b802096e.pdf [file b802096e.pdf]

## Electronic Supplementary Information for

# **Highly Fluorescent Supramolecular Gels with Chirality Transcription through Hydrogen Bonding**

Jangwon Seo, Jong Won Chung, Eun-Hye Jo and Soo Young Park\*

Organic Nano-Photonics Laboratory, Department of Materials Science and Engineering, Seoul  
National University, San 56-1, Shillim-dong, Kwanak-ku, Seoul 151-744, Korea

\*Corresponding author. E-mail: [parksy@snu.ac.kr](mailto:parksy@snu.ac.kr)

### Synthesis of CN-TFMBPPE

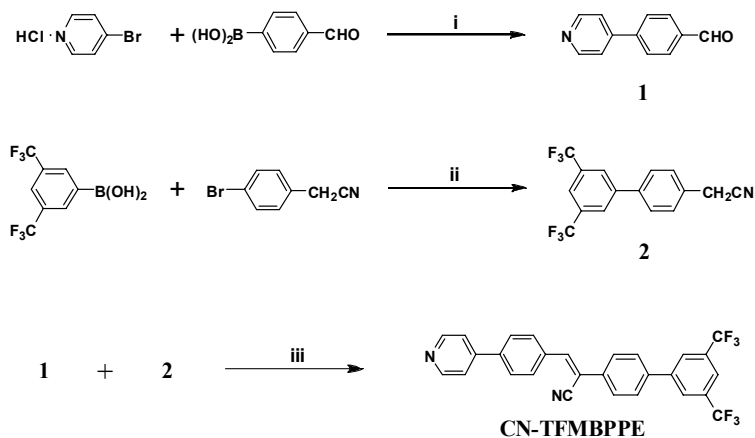

**Scheme S1.** Synthesis of CN-TFMBPPE. (i) Suzuki reaction; Tetrakis(triphenylphosphine)palladium(0), toluene / iso-propanol/ water (2N  $\text{K}_2\text{CO}_3$ ), reflux 7h; (ii) Suzuki reaction; Tetrakis(triphenylphosphine) palladium(0), THF / water (2N  $\text{K}_2\text{CO}_3$ ), reflux 12h; (iii) Knoevenagel reaction; tetrabutylammonium hydroxide, t-butylalcohol / THF,  $50^\circ\text{C}$ , 2h.

L- (or D-) Tartaric acid and 3,5-bis(trifluoromethyl)benzoic acid were purchased from Aldrich. **CN-TFMBPPE** was prepared according to the Scheme S1. The synthesis of **1** and **2** by using Suzuki coupling reaction were previously reported in the literature. (see reference; B.-K. An, D.-S. Lee, J.-S. Lee, Y.-S. Park, H.-S. Song, S. Y. Park, *J. Am. Chem. Soc.* **2004**, *126*, 10232. R. Mueller, M. Huerzeler, C. Boss, *Molecules* **2003**, *8*, 556.)

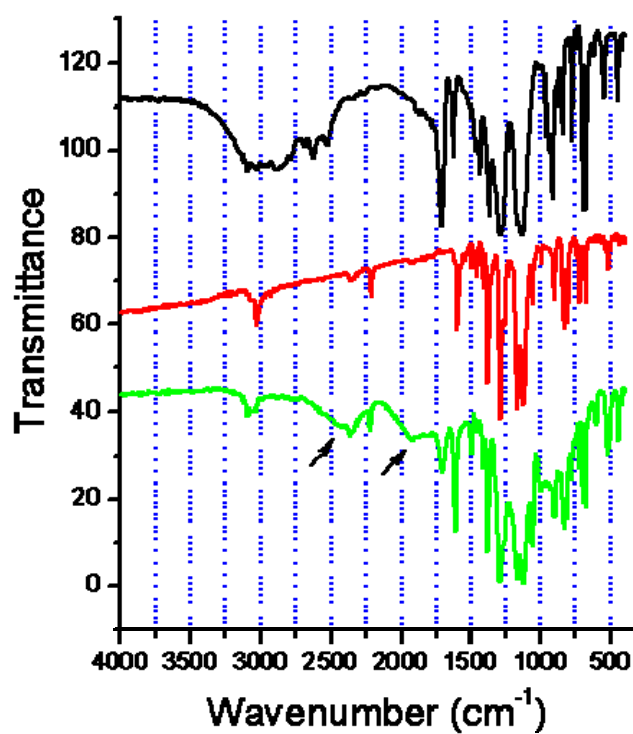

Figure S1. FT-IR spectra of 3,5-bistrifluoromethyl benzoic acid (BA) (black), CN-TFMBPPE (red), and BA-CNTFMBPPE complex gel (green).

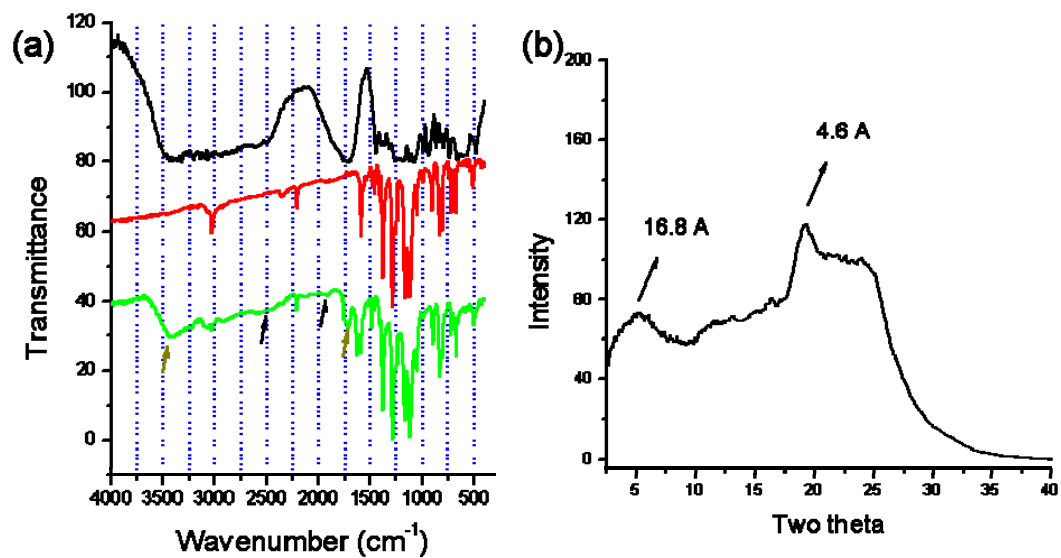

Figure S2. (a) FT-IR spectra of L-tartaric acid (TA) (black), CN-TFMBPPE (red), and L-TA-CNTFMBPPE complex gel (green). (b) XRD pattern of its dried gel.

(a)

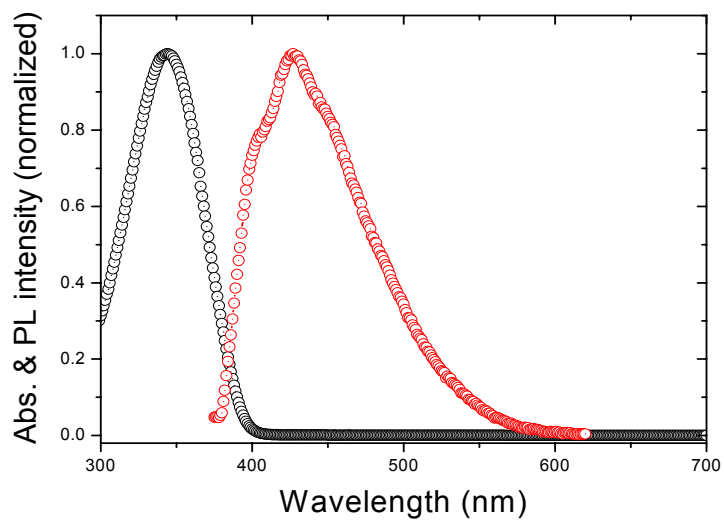

(b)

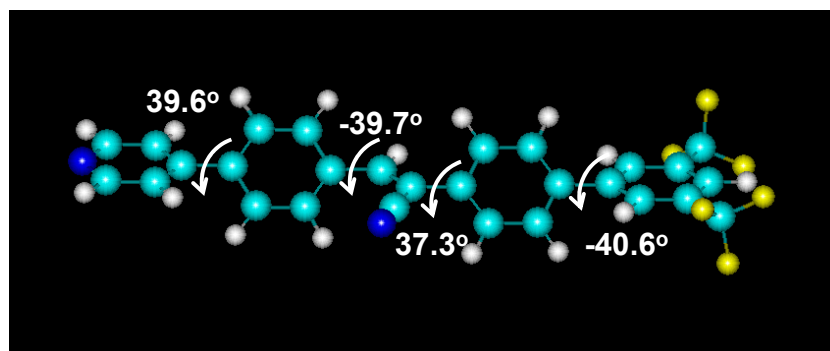

Figure S3. a) UV-vis. absorption (black) and emission (red) spectra of CN-TFMBPPE in 1,2-dichloroethane ( $\sim 10^{-5}$  M), excited at 340 nm. b) The optimized geometry conformation in the gas phase (calculated from HyperChem 7.0 with AM1 method).
